# Supplementary material for: A computational lens for sexual-stage transmission, reproduction, fitness and kinetics in Plasmodium falciparum
Source: Springer Nature journal article supplement (doi:10.1186/s12936-016-1538-5), 2016-09-21
Supplement: MOESM1 [file 10728456]

## Supplemental Material for A computational lens for sexual-stage transmission, reproduction, fitness and kinetics in *Plasmodium falciparum*

Mara K. N. Lawniczak and Philip A. Eckhoff

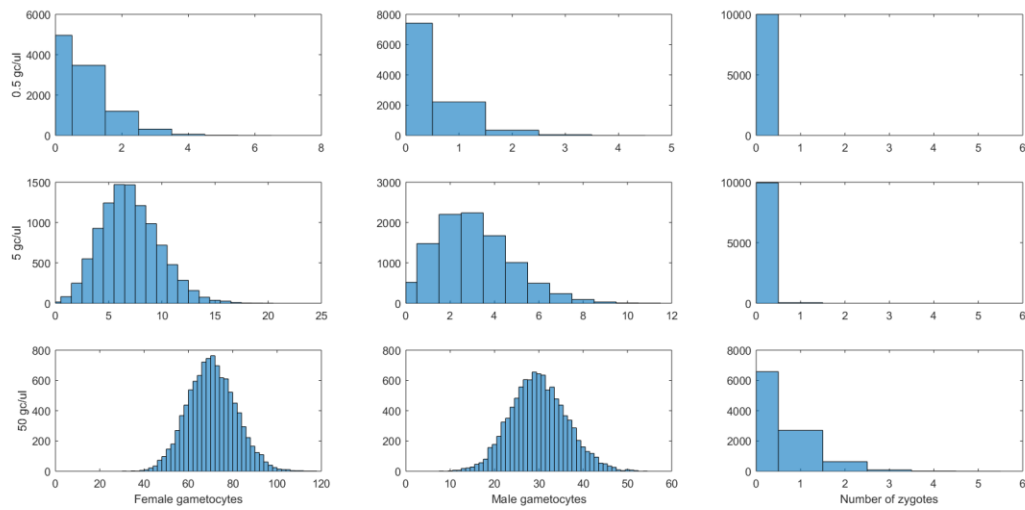

**Figure S1:** Histograms for female gametocytes, male gametocytes, and zygotes for Poisson draws with male gamete bloodmeal coverage of 0.0001 (black series in Figure 2).

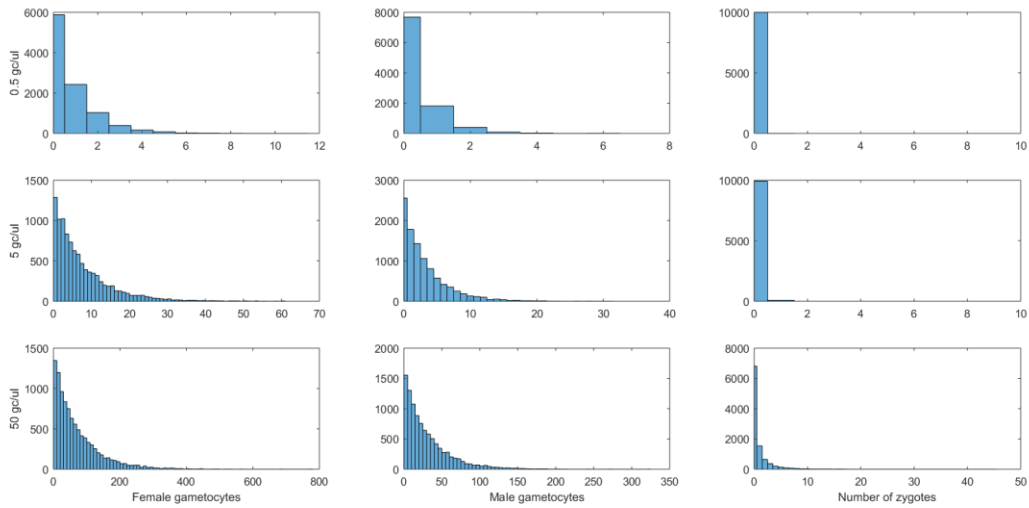

**Figure S2:** Histograms for female gametocytes, male gametocytes, and zygotes for negative binomial draws with male gamete bloodmeal coverage of 0.0001 (blue series in Figure 2).

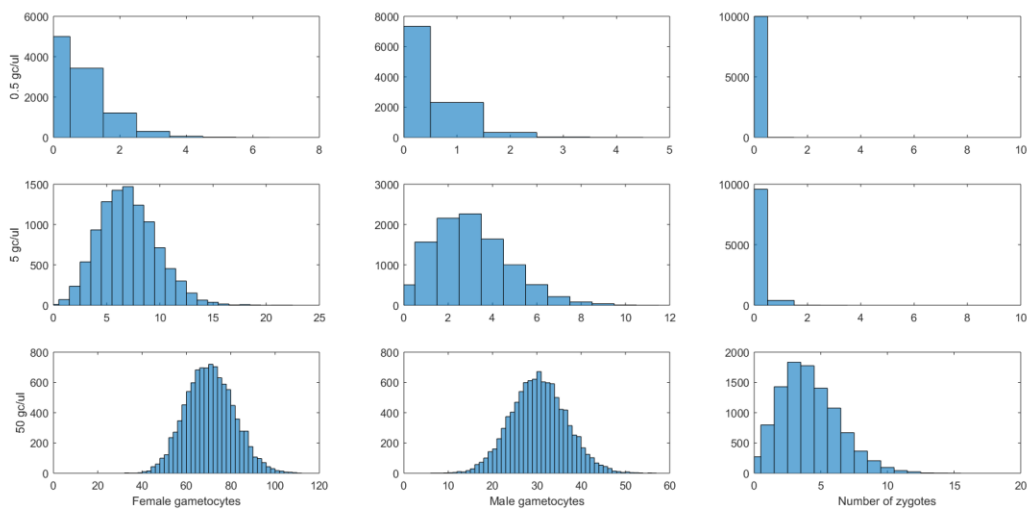

**Figure S3:** Histograms for female gametocytes, male gametocytes, and zygotes for Poisson draws with male gamete bloodmeal coverage of 0.001 (green series in Figure 2).

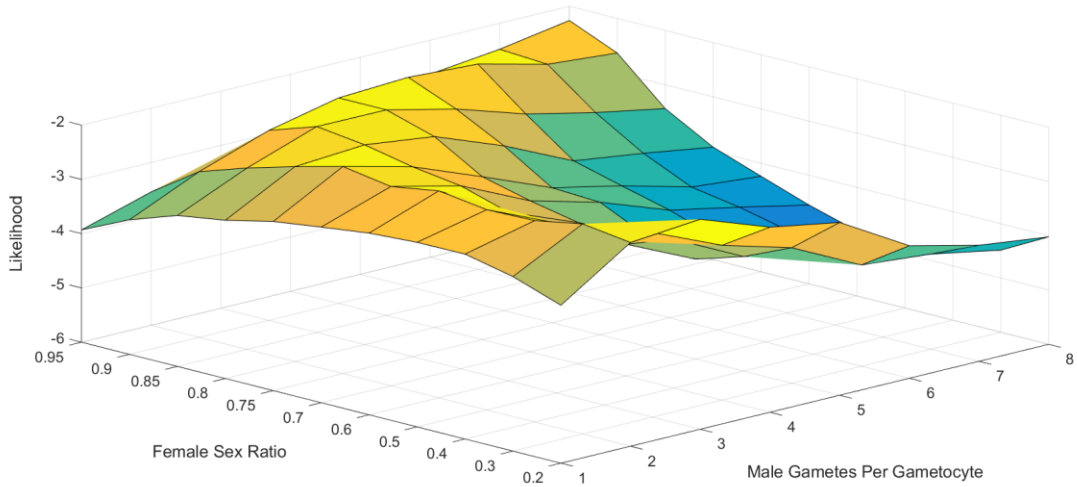

**Figure S4:** Varying female sex ratio versus male gametes per gametocyte for the best fitting model ( $k=0.6$ , coverage=0.004, blue-green in Figure 4) shows a likelihood ridge starting at 2 gametes per gametocyte for moderate sex ratios and increasing as the female sex ratio increases.

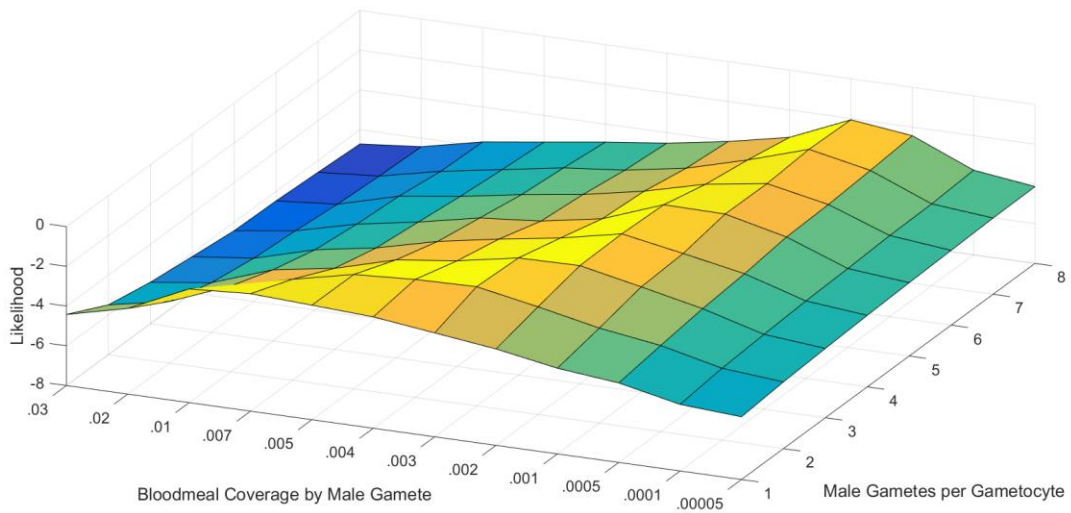

**Figure S5:** Varying bloodmeal coverage versus male gametes per gametocyte for the varying-k best fit in Figure 4 (orange). As male gametes per gametocyte increases, the required bloodmeal coverage by male gamete to achieve the best fit decreases approximately proportionally.
